# Supplementary material for: Extremely large magnetoresistance in the nonmagnetic semimetal YBi
Source: Royal Society of Chemistry journal article supplement (doi:10.1039/c8tc02839g), 2018-01-01
Supplement: c8tc02839g1.pdf [file c8tc02839g1.pdf]

## Extremely large magnetoresistance in the nonmagnetic semimetal YBi

B. Qian<sup>a</sup>, F. Tang<sup>a</sup>, Y. R. Ruan<sup>b,c</sup>, Y. Fang<sup>a,\*</sup>, Z. D. Han<sup>a</sup>, X. F. Jiang<sup>a</sup>, J. -M. Zhang<sup>b,c,\*</sup>, S. Y.

Chen<sup>b,c</sup>, and D. H. Wang<sup>d</sup>

<sup>a</sup>Jiangsu Laboratory of Advanced Functional Materials, Department of Physics, Changshu

Institute of Technology, Changshu 215500, China

<sup>b</sup>Fujian Provincial Key Laboratory of Quantum Manipulation and New Energy Materials, College

of Physics and Energy, Fujian Normal University, Fuzhou 350117, China.

<sup>c</sup>Fujian Provincial Collaborative Innovation Center for Optoelectronic Semiconductors and

Efficient Devices, Xiamen 361005, China.

<sup>d</sup>National Laboratory of Solid State Microstructures and Key Laboratory of Nanomaterials for

Jiang Su Province, Nanjing University, Nanjing 210093, People's Republic of China

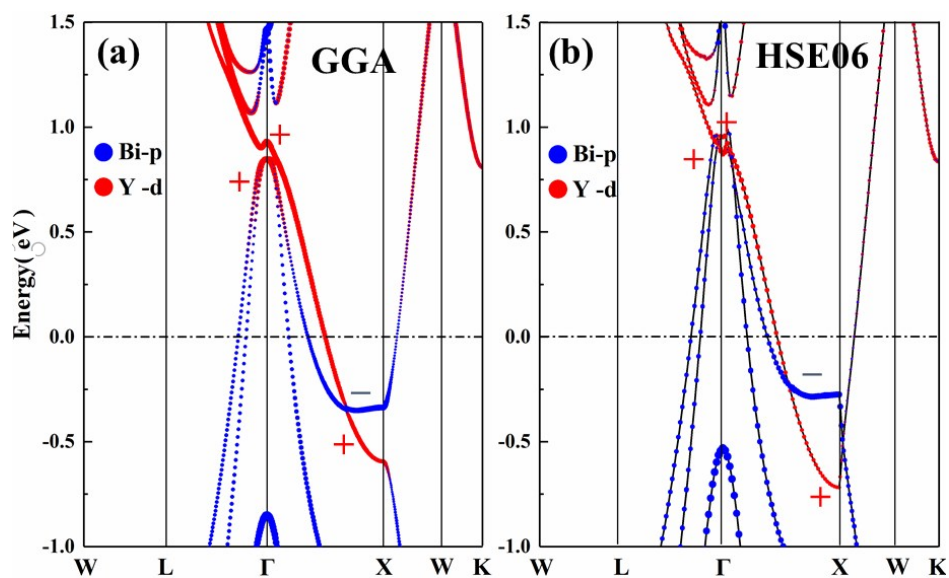

Figure S1. Calculated band structure of YBi within (a) GGA and (b) HSE06 level. In GGA calculation, it is found that the product of parities at 8 time-reversal-invariant points are “+++--+”, indicating that YBi is topological nontrivial with  $Z_2$  index

(1;000). Besides, the energy band structure checked by additional calculations within HSE06 also shows the same results.
